# Supplementary material for: Importance of the 1+7 configuration of ribonucleoprotein complexes for influenza A virus genome packaging
Source: PubMed Central journal article supplement (PMC5754346; doi:10.1038/s41467-017-02517-w), 2018-01-04
Supplement: 41467_2017_2517_MOESM3_ESM.pdf [file 41467_2017_2517_MOESM3_ESM.pdf]

**File Name:** Supplementary Movie 1

**Description:** Movie of the 3D-reconstructed virion containing eight RNPs shown in Figure 2e.

**File Name:** Supplementary Movie 2

**Description:** Movie of the 3D-reconstructed virion containing seven RNPs shown in Figure 2f.
